# Supplementary material for: Explaining the Increase of Diabetes Prevalence and Plasma Glucose in Mauritius
Source: Oxford University Press journal article supplement (doi:10.2337/dc11-0886), 2011-11-19

SUPPLEMENTARY DATA

**Supplementary Figure 1.** Tukey mean-difference quantile plots of fasting and two hour glucose

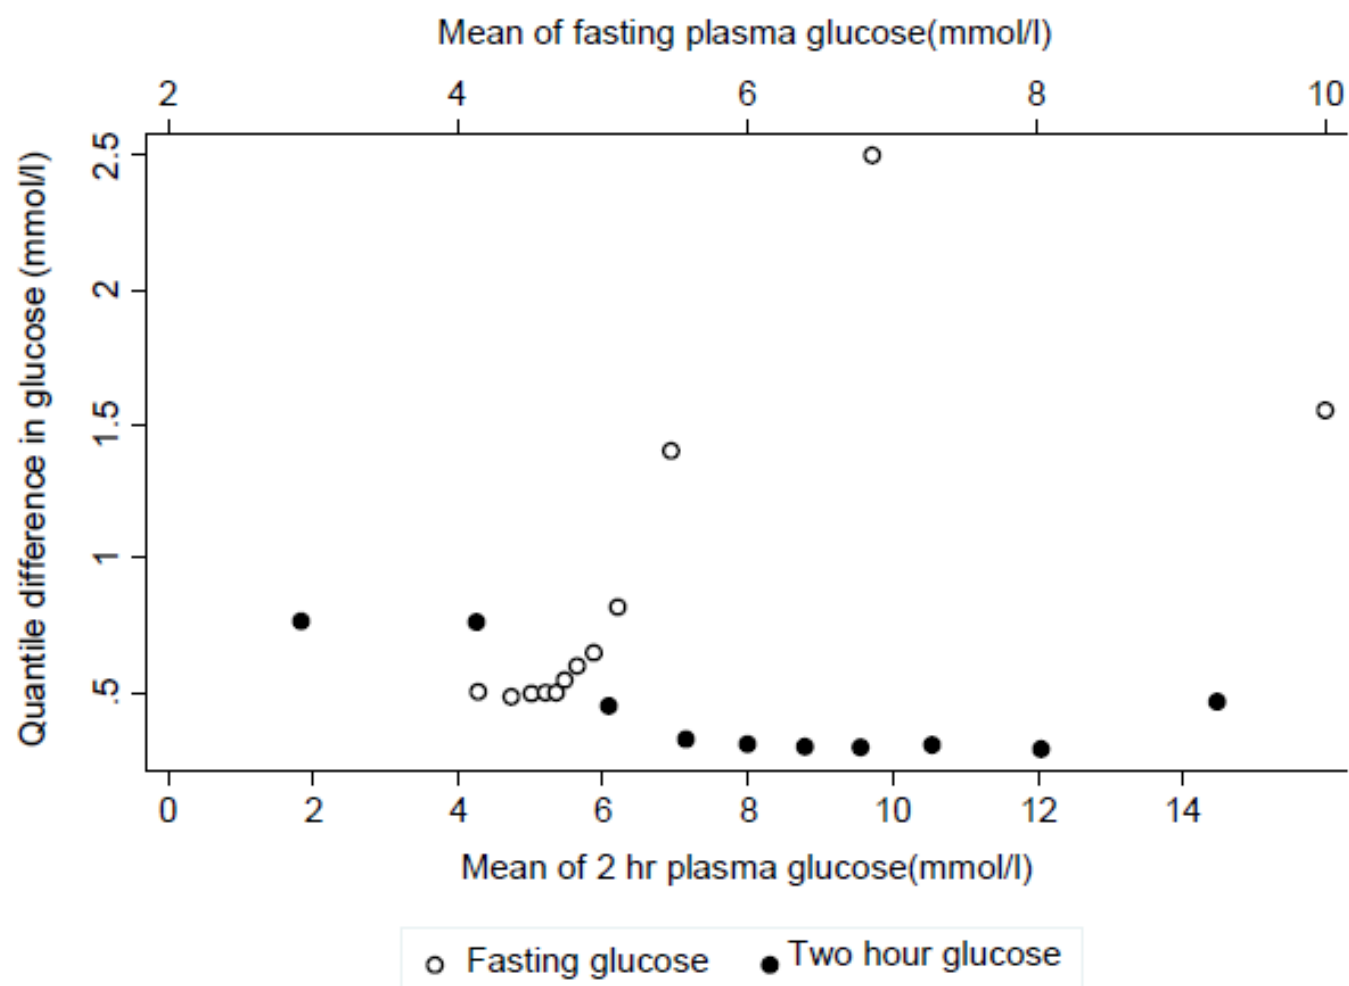

Supplement: dc110886supplementarydata.pdf [file dc110886supplementarydata.pdf]
